# Supplementary material for: Multiplex Detection of Fluorescent Chemokine Binding to CXC Chemokine Receptors by NanoBRET
Source: MDPI journal article supplement (doi:10.3390/ijms25095018), 2024-05-04
Supplement: s1 [file s1]

# Multiplex Detection of Fluorescent Chemokine Binding to CXC Chemokine Receptors by NanoBRET

Justyna M. Adamska , Spyridon Leftheriotis, Reggie Bosma, Henry F. Vischer and Rob Leurs \*

Amsterdam Institute of Molecular and Life Sciences, Division of Medicinal Chemistry, Faculty of Science,  
Vrije Universiteit Amsterdam, De Boelelaan 1083, 1081 HV Amsterdam, The Netherlands;  
spyleftheriotis@gmail.com (S.L.); h.f.vischer@vu.nl (H.F.V.)

\* Correspondence: r.leurs@vu.nl

## Supplementary Materials:

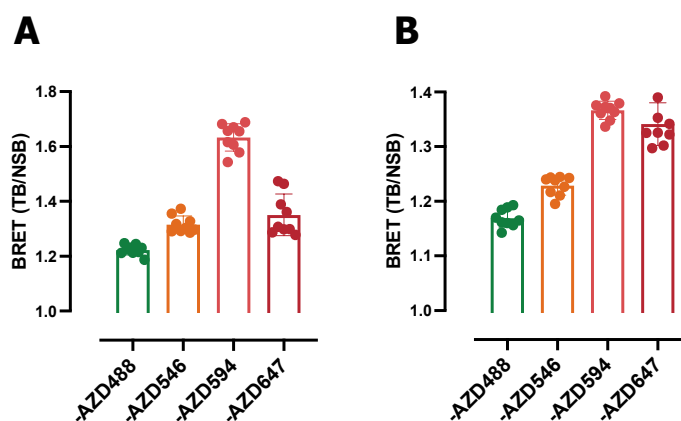

**Figure S1.** Fold total binding (TB) over non-specific (NSB) CXCL12-AZDxxx binding at  $K_D$  concentration for Nluc-ACKR3 (0.3 nM) (A) or NLuc-CXCR4 (12.5 nM) (B), resulting in 50% receptor occupancy. Data are shown as the BRET-ratio (BRET signal at acceptor of certain CXCL12-AZD divided by NanoLuciferase signal at 470 nm). Data are shown as the mean  $\pm$  SD of at least 3 independent experiments.

**Table S1.** List and structures of used small molecules.

| Small molecule | Structure | Mode of action  |
|----------------|-----------|-----------------|
| VUF16545       |           | Agonist [49]    |
| VUF25444       |           | Agonist [26])   |
| VUF15485       |           | Agonist [22]    |
| VUF25550       |           | Antagonist [19] |

|           |                                                                                    |                            |
|-----------|------------------------------------------------------------------------------------|----------------------------|
| VUF11211  | 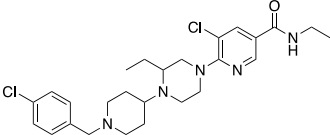  | Inverse agonist [50], [51] |
| IT1t      |   | Antagonist [27]            |
| AMD3100   |   | Antagonist [52]            |
| Burixafor |  | Antagonist [20]            |
